# Supplementary material for: Effect of the physicochemical changes in the antimicrobial durability of green synthesized silver nanoparticles during their long-term storage
Source: Royal Society of Chemistry journal article supplement (doi:10.1039/d2ra04667a), 2022-01-01
Supplement: d2ra04667a1.pdf [file d2ra04667a1.pdf]

1 **Electronic supporting information**

2 **Effect of the physicochemical changes in the antimicrobial durability of the green**  
3 **synthesized silver nanoparticles during their long-term storage**

4 **Giyaullah Habibullah\*, Jitka Viktorova, Pavel Ulbrich, Tomas Ruml**

5 **Department of Biochemistry and Microbiology, University of Chemistry and Technology,**  
6 **Technická 3, 166 28, Prague, Czech Republic.**

7 **\*Correspondence: [habibuli@vscht.cz](mailto:habibuli@vscht.cz)**

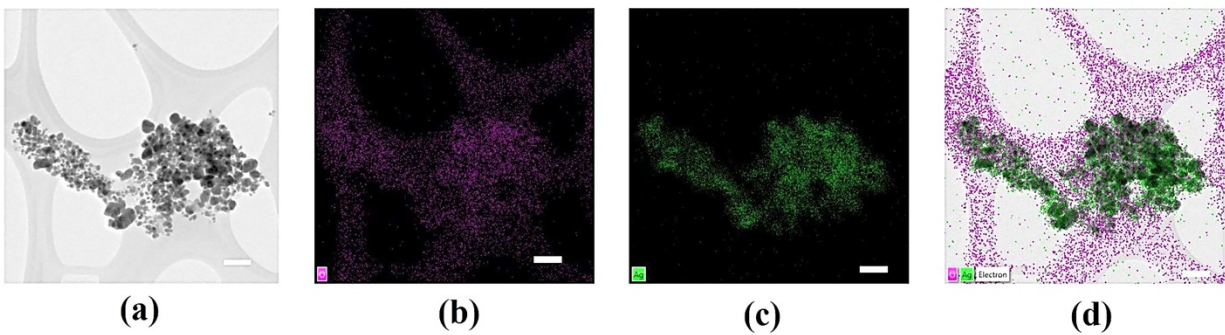

9 Fig. S1 HR-TEM images (Scale bar 100 nm) of AgNPs stored under light for 15 days; (a) EM  
 10 image, single element mapping of oxygen (b) and silver (c) corresponding to the EM image, (d)  
 11 combined chemical mapping of EM image, oxygen, and silver.

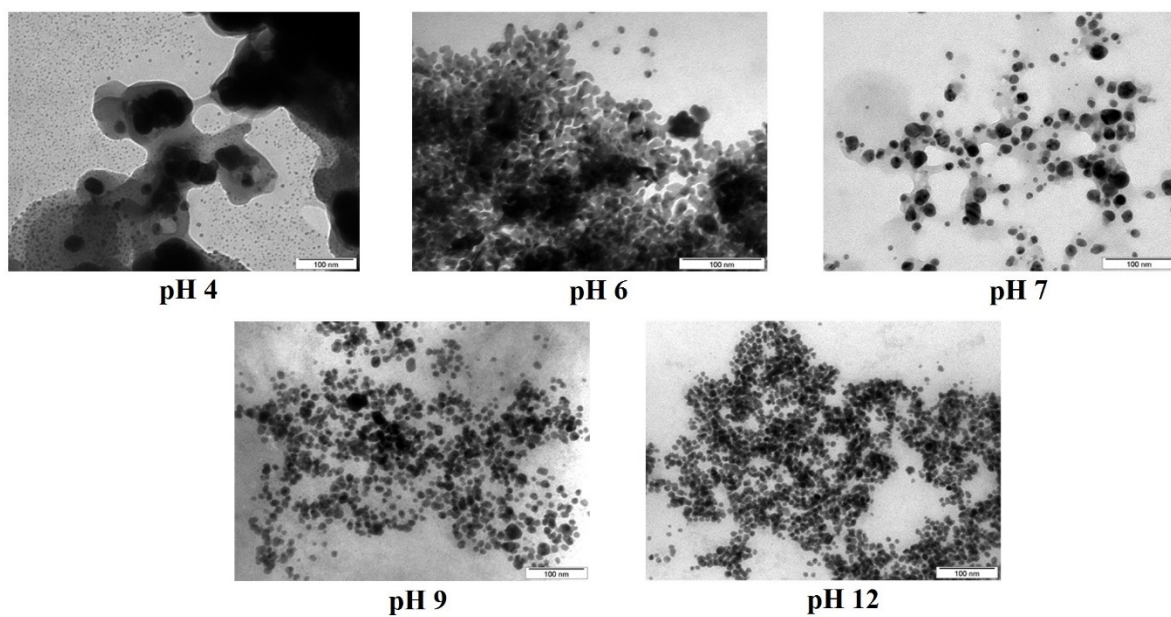

12  
 13 Fig. S2 TEM images (Scale bar 100 nm) of AgNPs synthesized at different pH values.

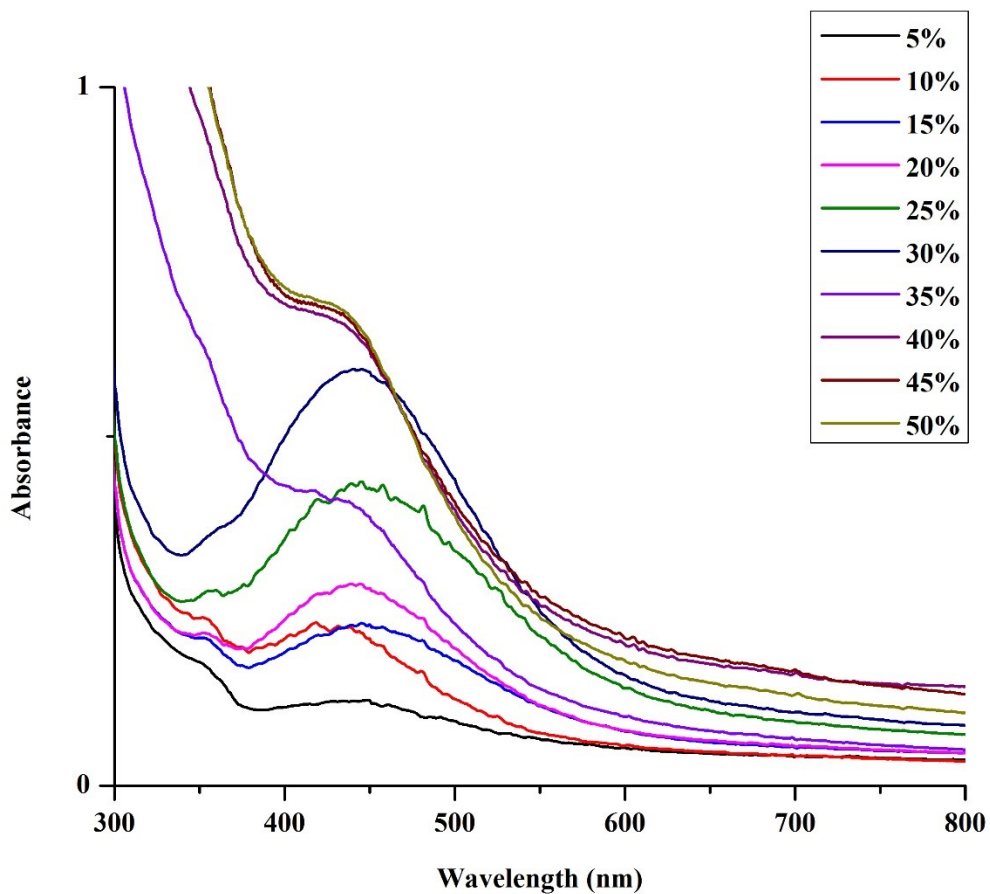

14

15 Fig. S3 Optimization of silver nanoparticles synthesis using *Saraca asoca* leaf extract, UV-Vis  
 16 spectrum of AgNPs that illustrates the effect of different volumes ratios of *S. asoca* leaf extract  
 17 (40 g/l) to 1mM AgNO<sub>3</sub> in the synthesis of AgNPs on the 4<sup>th</sup> day.

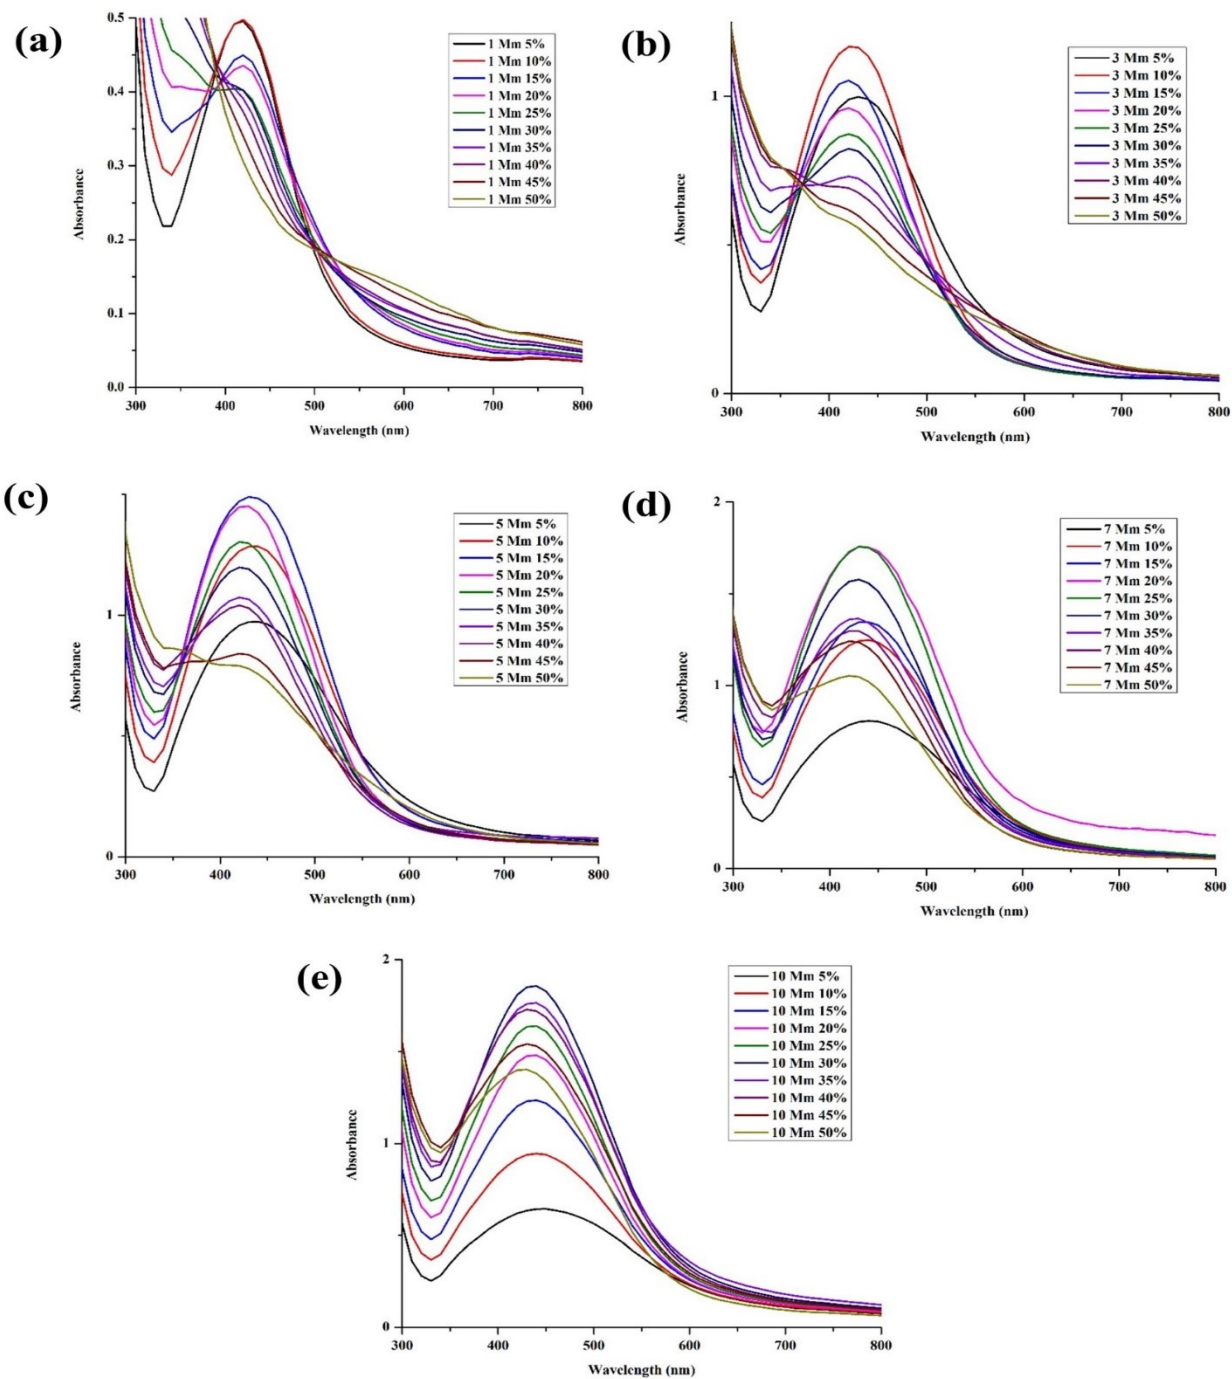

18

19 Fig. S4 Optimization of silver nanoparticles synthesis using *Saraca asoca* leaf extract,

20 UV-Vis spectrum of AgNPs that illustrates the effect of different volumes ratios of *S. asoca* leaf  
 21 extract (40 g/l) to (a) 1mM AgNO<sub>3</sub> (b) 3mM AgNO<sub>3</sub> (c) 5mM AgNO<sub>3</sub> (d) 7mM AgNO<sub>3</sub> (e) 10mM  
 22 AgNO<sub>3</sub> in the synthesis of AgNPs.

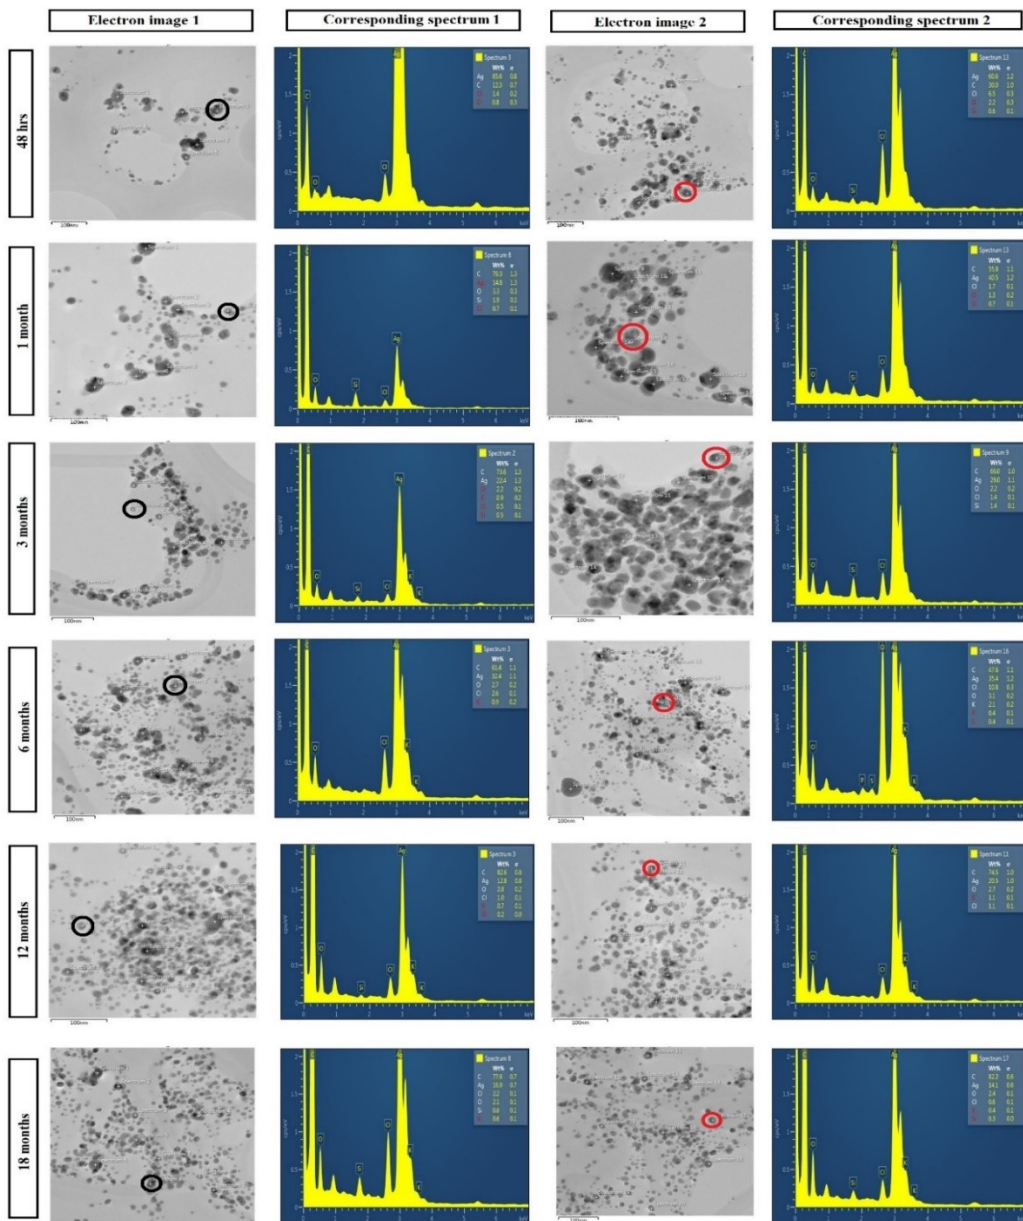

23

24 Fig. S5 EDX point analysis of AgNPs stored in dark conditions at room temperature in different  
 25 time intervals (scale bar 100 nm); the black circle in the electron images 1 refers to the region of  
 26 origin of the corresponding spectrum 1, the red circle in the electron images 2 refers to the region  
 27 of origin of the corresponding spectrum 2.
